# Supplementary material for: DnaJ-PKAc fusion induces liver inflammation in a zebrafish model of Fibrolamellar Carcinoma
Source: Oxford University Press journal article supplement (doi:10.1242/dmm.042564), 2020-01-01
Supplement: dmm042564supp.pdf [file dmm042564supp.pdf]

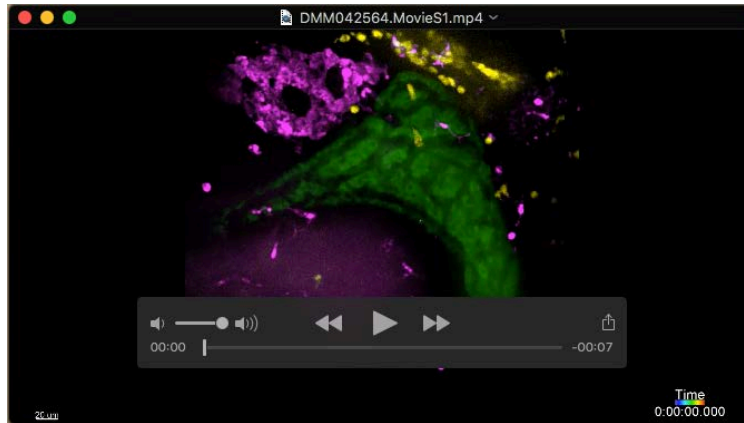

Movie 1: Time-lapse movies of leukocyte recruitment to liver area of 7-day post fertilization control larvae. Macrophage (magenta); neutrophil (yellow); Hepatocytes (green).

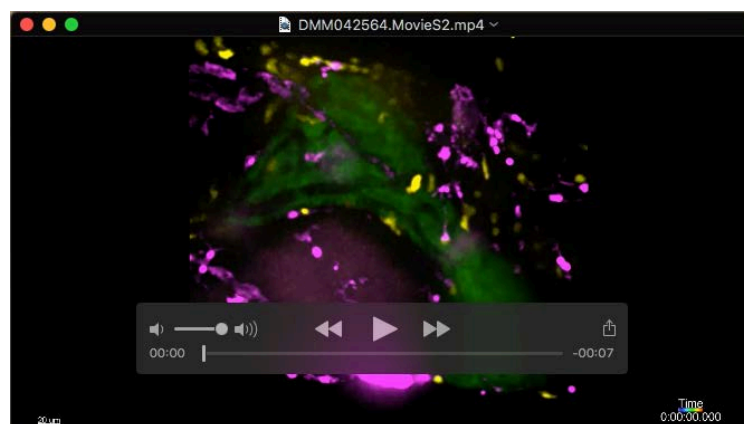

Movie 2: Time-lapse movies of leukocyte recruitment to liver area of 7-day post fertilization transgenic FLC larvae. Macrophage (magenta); neutrophil (yellow); Hepatocytes (green).
